# Supplementary material for: Synthesis, color-tunable emission, thermal stability, luminescence and energy transfer of Sm3+and Eu3+single-doped M3Tb(BO3)3(M = Sr and Ba) phosphors
Source: Royal Society of Chemistry journal article supplement (doi:10.1039/c6ce01400c), 2016-01-01
Supplement: c6ce01400c1.pdf [file c6ce01400c1.pdf]

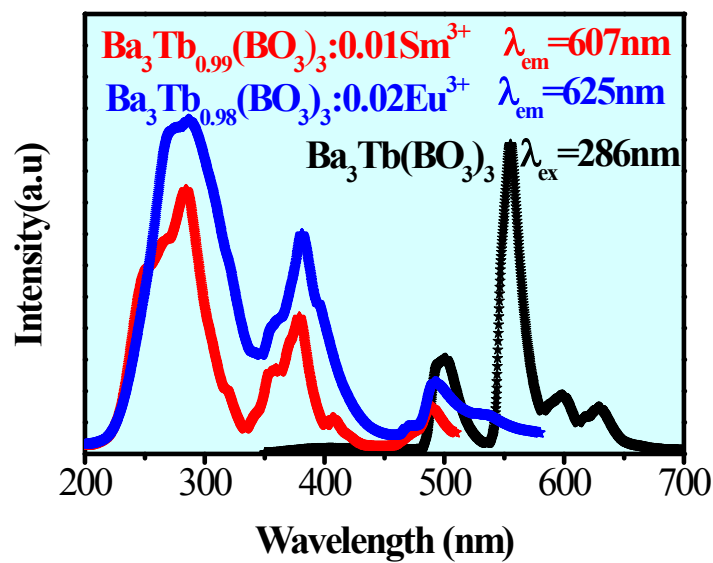

Figure S1 The emission spectra of  $\text{Ba}_3\text{Tb}(\text{BO}_3)_3$  ( $\lambda_{\text{ex}} = 286\text{ nm}$ ) and the excitation spectra ( $\lambda_{\text{em}} = 607\text{ nm}$ ) of  $\text{Ba}_3\text{Tb}_{0.99}(\text{BO}_3)_3:0.01\text{Sm}^{3+}$  and  $\text{Ba}_3\text{Tb}_{0.98}(\text{BO}_3)_3:0.02\text{Eu}^{3+}$  ( $\lambda_{\text{em}} = 625\text{ nm}$ ), respectively.

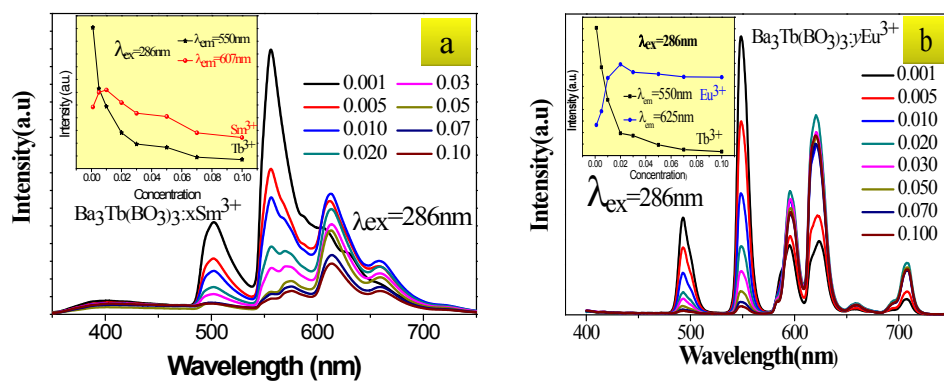

Figure S2 Emission spectra of  $\text{Sm}^{3+}$  ( $\lambda_{\text{ex}} = 286 \text{ nm}$ ) (a) and  $\text{Eu}^{3+}$  ( $\lambda_{\text{ex}} = 286 \text{ nm}$ ) (b).

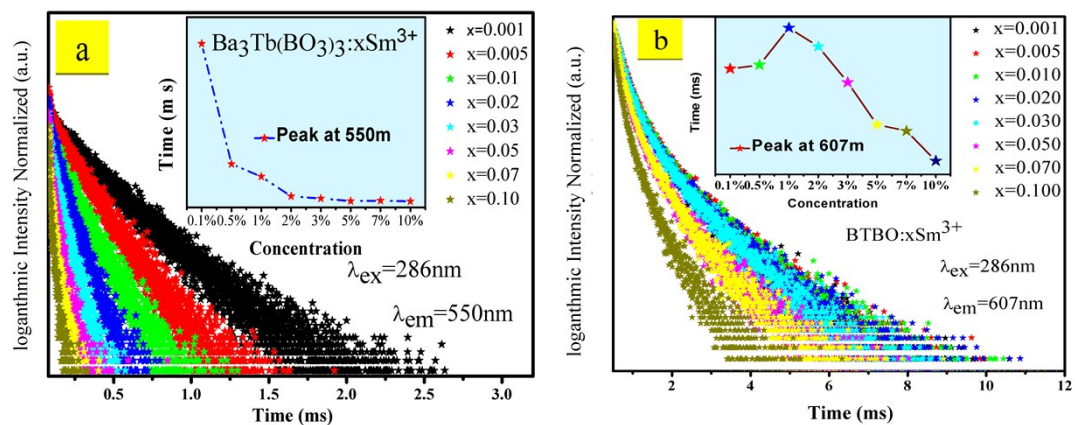

Figure S3 The luminescence lifetimes of  $Tb^{3+}$  (a) and  $Sm^{3+}$  (b) in  $Ba_3Tb(BO_3)_3:xSm^{3+}$ .

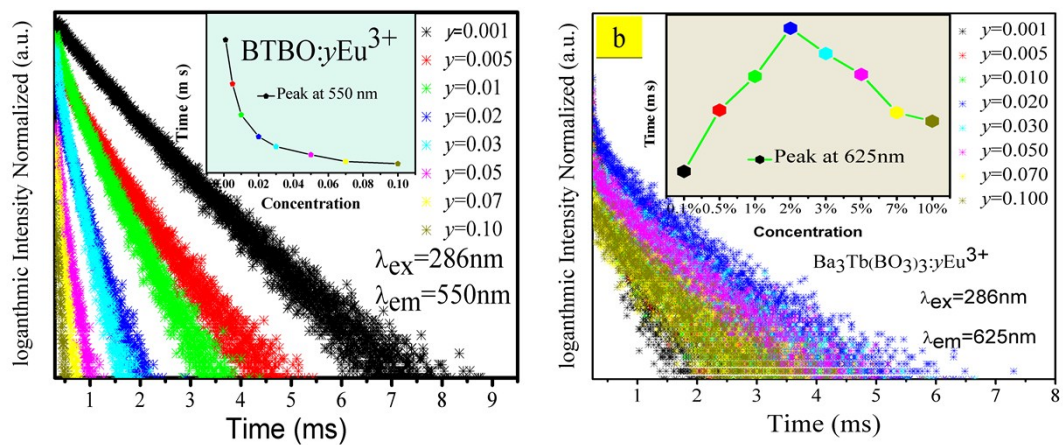

Figure S4 The luminescence lifetimes of Tb<sup>3+</sup> (a) and Eu<sup>3+</sup> (b) in Ba<sub>3</sub>Tb(BO<sub>3</sub>)<sub>3</sub>:yEu<sup>3+</sup>.

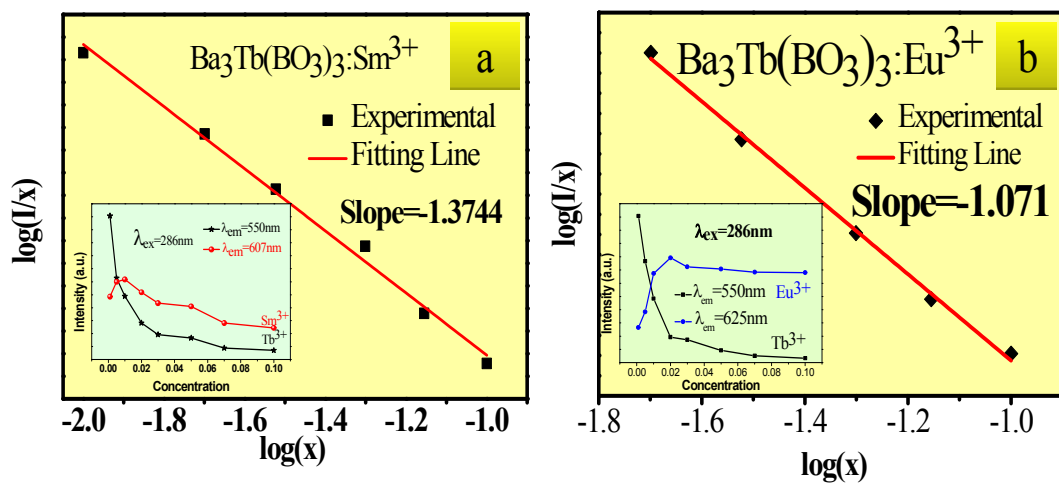

Figure S5 Plot of  $\log(I/x)$  as function of  $\log(x)$  in  $\text{Ba}_3\text{Tb}(\text{BO}_3)_3:x\text{Sm}^{3+}$  and  $\text{Ba}_3\text{Tb}(\text{BO}_3)_3:y\text{Eu}^{3+}$ . The inset is the emission intensities as function of  $\text{Sm}^{3+}$  ( $\text{Eu}^{3+}$ ) concentration ( $\lambda_{\text{ex}}=286\text{nm}$ ).
